# Supplementary material
Source: PubMed Central journal article supplement (PMC5038308)
Supplement: AAC.00710-16_zac010165512so1.pdf [file AAC.00710-16_zac010165512so1.pdf]

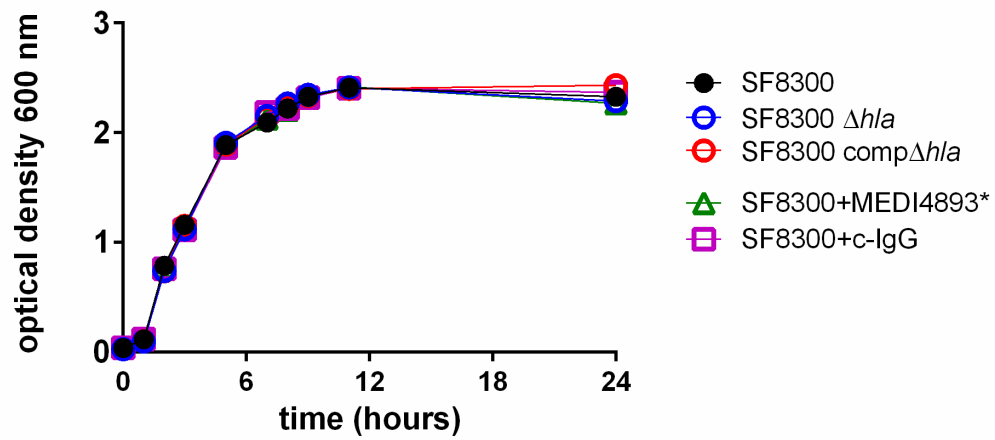

Supplemental Figure 1. Growth curves of SF8300 WT,  $\Delta hla$ , and  $comp\Delta hla$  strains in tryptic soy broth (TSB), and growth curves of SF8300 WT in TSB containing 50  $\mu\text{g/mL}$  of MEDI4893\* or c-IgG.

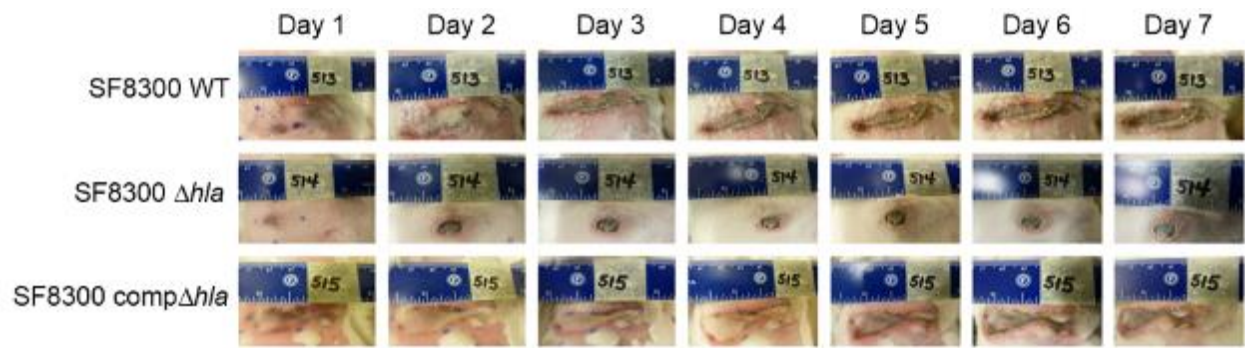

**Supplemental Figure 2. Representative gross images of dermonecrotic ulceration caused by SF8300 WT,  $\Delta hla$ , and comp $\Delta hla$  strains over the seven-day infection period.**

SF8300  $\Delta hla$

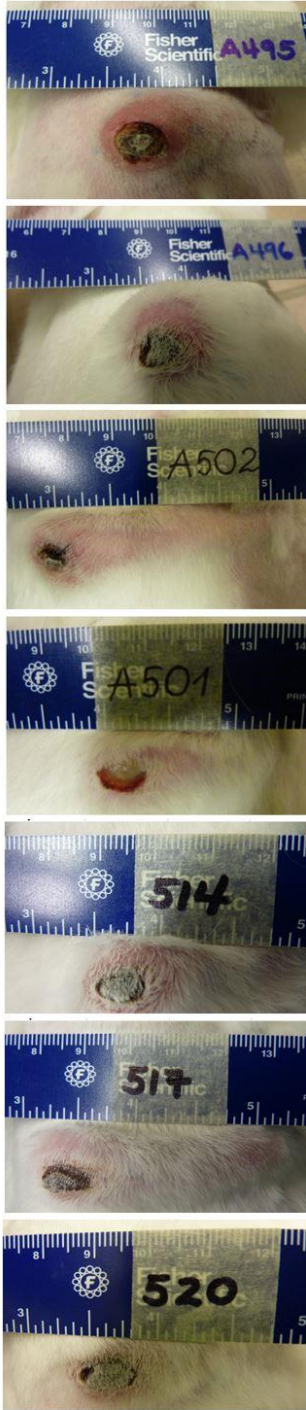

SF8300 WT

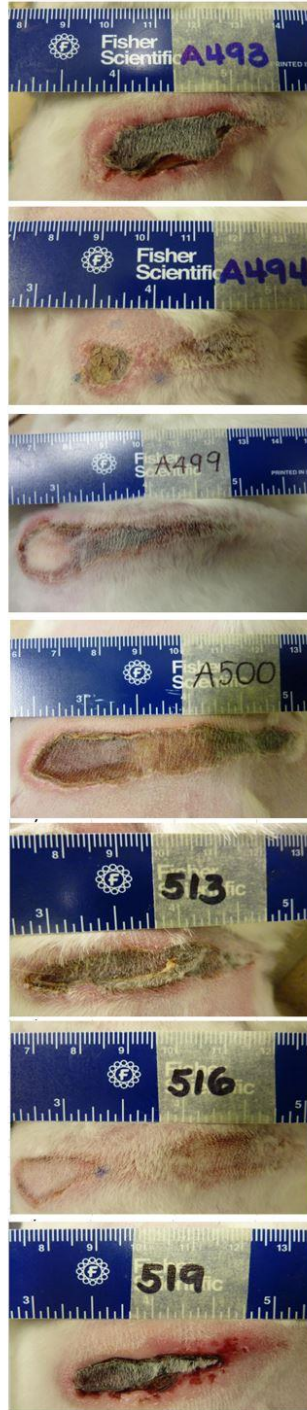

SF8300 comp $\Delta hla$

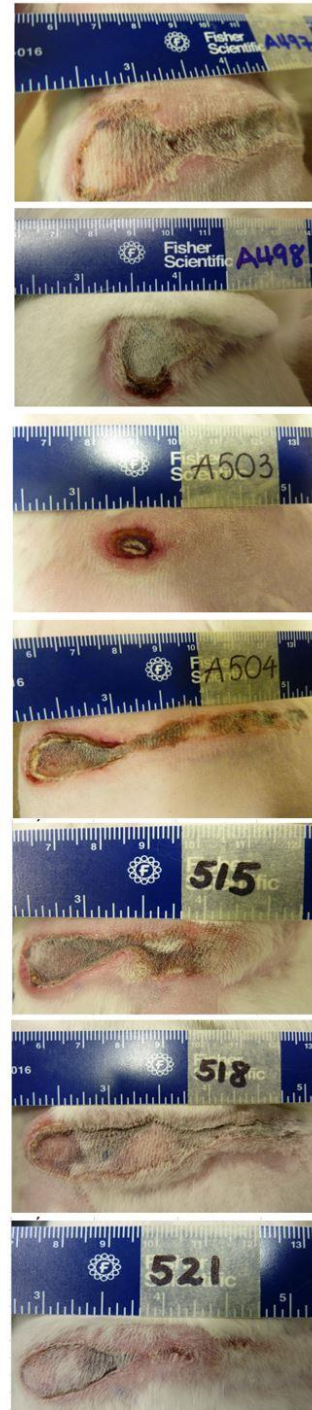

Supplemental Figure 3. Gross images of dermonecrotic ulceration caused by SF8300 WT,  $\Delta hla$ , and comp $\Delta hla$  strains on Day 7 post infection.

**Supplemental Table 1. Oligonucleotides used for construction of in-frame gene deletions using pKOR1 allelic replacement system (9, 16).**

| <b>Oligo ID</b>                                                                                                                                           | <b>Nucleotide sequence 5' to 3'</b>                             |
|-----------------------------------------------------------------------------------------------------------------------------------------------------------|-----------------------------------------------------------------|
| <b><i>For in-frame deletion of gene encoding alpha-toxin (Hla)</i></b>                                                                                    |                                                                 |
| Hla-X1                                                                                                                                                    | GATTTATTATGTCTTAGGCTCTATTCC                                     |
| Hla-X2                                                                                                                                                    | CCATTTATCTTTAGTATTGGTACCTTTCCATGTTGTTACTGAGCTGACTATACG          |
| Hla-X3                                                                                                                                                    | CGTATAGTCAGCTCAGTAACAACATGGAAAGGTACCAATACTAAAGATAAATGG          |
| Hla-X4                                                                                                                                                    | TTAGGATAATCGACGTAAGAAGAATC                                      |
| Hla-X5                                                                                                                                                    | GGGG ACAAGTTTGTACAAAAAGCAGGCT CTTTATTGTCCCATGATTAGTGTTTC        |
| Hla-X6                                                                                                                                                    | GGGG ACCACTTTGTACAAGAAAGCTGGGT GCATCATTTGTTGTTAATAATGGGAC       |
| Hla-S1                                                                                                                                                    | CCCTCGAAATTGAAATGCTTC                                           |
| Hla-S2                                                                                                                                                    | CCTCATATAGTGTATGTTTAGTC                                         |
| <b><i>For complementation of <math>\Delta hla</math> mutation, primers Hla-X1, X4, X5, X5, S1, S2 above were used with X2c and X3c primers below.</i></b> |                                                                 |
| Hla-X2c                                                                                                                                                   | CTCTTTTGTATCAATCGAATTTCTTGGGTAATAATCAGATATTTGAGCTACTTCATTATCAGG |
| Hla-X3c                                                                                                                                                   | CCTGATAATGAAGTAGCTCAAATATCTGATTATTACCCAAGAAATTCGATTGATACAAAAGAG |

**Supplemental Table 2. Pharmacokinetic parameters of linezolid in serum after a single subcutaneous dose of 25 mg/kg.**

|                                                                | <b>25 mg/kg linezolid s.c.*</b> |
|----------------------------------------------------------------|---------------------------------|
| $C_{\max}$ ( $\mu\text{g/mL}$ )                                | $16.0 \pm 0.5$                  |
| $T_{\max}$ (h)                                                 | $0.75 \pm 0.29$                 |
| $t_{1/2}$ (h)                                                  | $0.64 \pm 0.05$                 |
| $AUC_{0\text{ to }\infty}$ ( $\mu\text{g} \cdot \text{h/mL}$ ) | $26.3 \pm 3.8$                  |

\*values represent means of 4 animals  $\pm$  standard deviation



**Supplemental Table 4. Mean dermonecrosis area ( $\pm$ SEM) and unpaired *t* test *P* values (two-sided) with Welch's correction for prophylaxis study with MEDI4893\* and c-IgG (related to Figure 4A)**

|                                                                        | Day 1        | Day 2        | Day 3        | Day 4        | Day 5        | Day 6        | Day 7        |
|------------------------------------------------------------------------|--------------|--------------|--------------|--------------|--------------|--------------|--------------|
| <b>Dermonecrosis area (mm<sup>2</sup>) <math>\pm</math> SEM</b>        |              |              |              |              |              |              |              |
| c-IgG                                                                  | 237 $\pm$ 48 | 355 $\pm$ 59 | 366 $\pm$ 71 | 349 $\pm$ 73 | 324 $\pm$ 69 | 325 $\pm$ 64 | 299 $\pm$ 69 |
| MEDI4893*                                                              | 26 $\pm$ 3   | 33 $\pm$ 3   | 34 $\pm$ 4   | 35 $\pm$ 8   | 34 $\pm$ 5   | 34 $\pm$ 4   | 31 $\pm$ 4   |
| <b>Unpaired <i>t</i> test with Welch's correction, <i>P</i> values</b> |              |              |              |              |              |              |              |
| c-IgG vs. MEDI4893*                                                    | 0.003        | 0.001        | 0.002        | 0.004        | 0.004        | 0.003        | 0.006        |

**Supplemental Table 5. Mean dermonecrosis area ( $\pm$ SEM) and multiplicity-adjusted *P*-values for rabbits treated with linezolid and/or MEDI4893\* at 2 h post-infection (related to Figure 5A)**

|                                                                                                                                | Day 1        | Day 2         | Day 3         | Day 4         | Day 5         | Day 6         | Day 7         |
|--------------------------------------------------------------------------------------------------------------------------------|--------------|---------------|---------------|---------------|---------------|---------------|---------------|
| <b>Dermonecrosis area (mm<sup>2</sup>) <math>\pm</math> SEM</b>                                                                |              |               |               |               |               |               |               |
| c-IgG                                                                                                                          | 554 $\pm$ 96 | 645 $\pm$ 124 | 662 $\pm$ 123 | 712 $\pm$ 144 | 696 $\pm$ 137 | 696 $\pm$ 138 | 708 $\pm$ 133 |
| MEDI4893*                                                                                                                      | 148 $\pm$ 37 | 194 $\pm$ 47  | 188 $\pm$ 41  | 186 $\pm$ 41  | 190 $\pm$ 39  | 186 $\pm$ 40  | 199 $\pm$ 42  |
| Linezolid                                                                                                                      | 326 $\pm$ 68 | 326 $\pm$ 65  | 316 $\pm$ 65  | 310 $\pm$ 64  | 320 $\pm$ 64  | 329 $\pm$ 70  | 321 $\pm$ 68  |
| Linezolid + MEDI4893*                                                                                                          | 122 $\pm$ 22 | 121 $\pm$ 23  | 128 $\pm$ 24  | 128 $\pm$ 23  | 131 $\pm$ 23  | 128 $\pm$ 26  | 133 $\pm$ 24  |
| <b>One-way ANOVA of log<sub>10</sub> transformed data followed by Tukey's post test, multiplicity adjusted <i>P</i> values</b> |              |               |               |               |               |               |               |
| c-IgG vs. LZD                                                                                                                  | 0.124        | 0.090         | 0.047         | 0.018         | 0.019         | 0.044         | 0.024         |
| c-IgG vs. MEDI4893*                                                                                                            | <0.001       | 0.001         | <0.001        | <0.001        | <0.001        | <0.001        | <0.001        |
| c-IgG vs. LZD + MEDI4893*                                                                                                      | <0.001       | <0.001        | <0.001        | <0.001        | <0.001        | <0.001        | <0.001        |
| LZD vs. MEDI4893*                                                                                                              | 0.067        | 0.236         | 0.308         | 0.328         | 0.304         | 0.231         | 0.354         |
| LZD vs. LZD + MEDI4893*                                                                                                        | 0.019        | 0.027         | 0.033         | 0.032         | 0.022         | 0.019         | 0.036         |
| MEDI4893* vs. LZD + MEDI4893*                                                                                                  | 0.954        | 0.747         | 0.698         | 0.662         | 0.599         | 0.665         | 0.667         |
